# Supplementary material for: Stability and selectivity of pre-concentration methods for gaseous oxidized mercury in the air
Source: Copernicus journal article supplement (doi:10.5194/egusphere-2025-2451), 2025-12-05
Supplement: Supplementary file 1 [file egusphere-2025-2451-supplement.pdf]

## Supplementary Material

# Stability and selectivity of pre-concentration methods for gaseous oxidized mercury in the air

Sreekanth Vijayakumaran Nair<sup>1,2</sup>, Saeed Waqar Ali<sup>1,2</sup>, Jan Gačnik<sup>1,2</sup>, Igor Živković<sup>1,2</sup>, Teodor-Daniel Andron<sup>1,2</sup>, Oleg Travnikov<sup>1</sup>, Milena Horvat<sup>1,2</sup>

<sup>1</sup>Department of Environmental Sciences, Jožef Stefan Institute, Ljubljana, Slovenia

<sup>2</sup>Jožef Stefan International Postgraduate School, Ljubljana, Slovenia

Correspondence to: Milena Horvat ([milena.horvat@ijs.si](mailto:milena.horvat@ijs.si))

Table S1. Mass balance for plasma oxidation of  $^{197}\text{Hg}^0$  to  $^{197}\text{Hg}^{\text{II}}$  performed on different denuders. Plasma GOM refers to  $^{197}\text{Hg}^{\text{II}}$  retained on denuders, generated by the NTP oxidation method whereas breakthrough refers to unoxidized  $^{197}\text{Hg}^0$  collected on Au trap. Mass balance is given as sum of both NTP generated  $\text{Hg}^{\text{II}}$  and breakthrough.

|           | Plasma GOM (%) | Breakthrough (%) | Mass balance (%) |
|-----------|----------------|------------------|------------------|
| Denuder A | 96.1           | 3.8              | 99.9             |
|           | 94.0           | 7.4              | 101.5            |
|           | 92.3           | 8.2              | 100.5            |
| Denuder B | 86.8           | 9.2              | 96.0             |
|           | 89.6           | 11.6             | 101.1            |
|           | 89.7           | 11.2             | 100.9            |
| Denuder C | 86.2           | 11.3             | 97.5             |
|           | 89.3           | 11.9             | 101.2            |
|           | 93.1           | 8.1              | 101.2            |

Table S2. Plasma oxidation of  $\text{Hg}^0$  to  $\text{Hg}^{\text{II}}$  performed on CEMs for the production of  $\text{HgO}$ ,  $\text{HgCl}_2$ , and  $\text{HgBr}_2$ . Overall mass balances for NTP- $\text{Hg}^{\text{II}}$  loading are represented here, as the sum of  $\text{Hg}^{\text{II}}$  recovered from CEMs by digestion, residual leftover in CEMs post-digestion,  $\text{Hg}^{\text{II}}$  recovered from the inner Teflon walls of the filter pack (FP), and breakthrough collected on the Au trap during loading.

| $\text{Hg}^{\text{II}}$ species | CEM digestate (%) | CEM residual (%) | Retained on FP (%) | Breakthrough (%) | Mass balance (%) |
|---------------------------------|-------------------|------------------|--------------------|------------------|------------------|
| $\text{HgO}$                    | 89.6              | 6.5              | 5.8                | 2.9              | 104.8            |
|                                 | 79.0              | 6.8              | 4.8                | 3.5              | 94.2             |
|                                 | 78.4              | 3.0              | 8.8                | 7.3              | 97.5             |
|                                 | 86.2              | 2.6              | 5.1                | 4.5              | 98.4             |
|                                 | 80.4              | 3.9              | 8.2                | 4.9              | 97.4             |
| $\text{HgCl}_2$                 | 85.9              | 3.7              | 8.3                | 0.0              | 97.9             |
|                                 | 88.7              | 3.7              | 4.0                | 0.2              | 96.6             |
|                                 | 91.0              | 5.4              | 0.8                | 0.0              | 97.2             |
|                                 | 84.6              | 5.8              | 7.6                | 0.0              | 98.0             |

|                   |      |     |      |     |      |
|-------------------|------|-----|------|-----|------|
|                   | 86.0 | 7.1 | 3.0  | 0.5 | 96.6 |
|                   | 84.5 | 7.5 | 2.2  | 0.0 | 94.2 |
| HgBr <sub>2</sub> | 82.5 | 5.7 | 7.8  | 0.4 | 96.4 |
|                   | 83.6 | 5.6 | 7.4  | 0.3 | 96.9 |
|                   | 82.6 | 4.7 | 7.4  | 0.3 | 95.0 |
|                   | 86.6 | 6.2 | 1.1  | 0.7 | 94.6 |
|                   | 68.8 | 5.5 | 17.9 | 0.8 | 93.0 |
|                   | 87.3 | 6.3 | 4.6  | 0.8 | 99.0 |

Table S3. Hg<sup>II</sup> sample losses from freshly prepared denuders when exposed to various airflows. Mass balances are presented as the sum of <sup>197</sup>Hg<sup>II</sup> losses quantified at each exposure period (4 × 0.5 hours), based on the initially loaded <sup>197</sup>Hg<sup>II</sup> on the denuders, and the <sup>197</sup>Hg<sup>II</sup> finally recovered from the denuders at the end of the exposure period through thermal decomposition, referred to as the 'Measured' fraction.

| Denuders            | Loss at<br>0.5 hrs (%) | Loss at<br>1.0 hrs (%) | Loss at<br>1.5 hrs (%) | Loss at<br>2.0 hrs (%) | Measured<br>fraction (%) | Mass<br>balance (%) |
|---------------------|------------------------|------------------------|------------------------|------------------------|--------------------------|---------------------|
| N <sub>2</sub> flow |                        |                        |                        |                        |                          |                     |
| A                   | 10.3                   | n.d                    | 1.6                    | n.d                    | 90.1                     | 102.0               |
|                     | 16.8                   | n.d                    | n.d                    | n.d                    | 82.6                     | 99.4                |
|                     | 3.7                    | 0.2                    | n.d                    | n.d                    | 96.4                     | 100.2               |
| B                   | 10.0                   | 1.6                    | n.d                    | 0.4                    | 90.7                     | 102.7               |
|                     | 4.3                    | n.d                    | 1.9                    | n.d                    | 93.8                     | 100.0               |
|                     | 2.1                    | n.d                    | n.d                    | n.d                    | 94.2                     | 96.3                |
| C                   | 6.1                    | n.d                    | n.d                    | n.d                    | 97.6                     | 103.7               |
|                     | 4.1                    | n.d                    | 0.6                    | n.d                    | 95.2                     | 99.8                |
|                     | 0.1                    | 0.4                    | n.d                    | n.d                    | 98.7                     | 99.3                |
| Ambient air - dark  |                        |                        |                        |                        |                          |                     |
| A                   | 15.6                   | 12.2                   | 9.6                    | 13.9                   | 47.3                     | 98.6                |
|                     | 8.4                    | 8.3                    | n.d                    | 2.1                    | 79.8                     | 98.7                |
|                     | 4.1                    | 4.1                    | 4.6                    | 8.7                    | 77.9                     | 99.3                |
| B                   | 19.1                   | 20.3                   | 10.9                   | 11.2                   | 39.5                     | 100.9               |
|                     | 8.7                    | 7.8                    | 2.1                    | 3.2                    | 81.0                     | 102.9               |
|                     | 4.4                    | 4.7                    | 6.0                    | 9.3                    | 77.3                     | 101.7               |
| C                   | 16.0                   | 14.0                   | 17.6                   | 11.2                   | 41.9                     | 100.7               |
|                     | 14.0                   | 5.4                    | n.d                    | 2.3                    | 78.1                     | 99.8                |
|                     | 6.5                    | 6.8                    | 8.9                    | 3.2                    | 72.3                     | 97.7                |
| Ambient air - light |                        |                        |                        |                        |                          |                     |
| A                   | 4.2                    | 7.1                    | 3.8                    | 8.1                    | 76.8                     | 100.0               |
|                     | 3.2                    | 0.5                    | 5.7                    | 6.0                    | 85.3                     | 100.8               |
|                     | 7.9                    | 3.0                    | 2.7                    | 6.1                    | 80.0                     | 99.7                |
| B                   | 7.1                    | 7.4                    | 7.5                    | 8.1                    | 74.4                     | 104.4               |
|                     | 4.6                    | 2.1                    | 4.8                    | 3.0                    | 86.3                     | 100.8               |
|                     | 3.1                    | 3.5                    | 4.3                    | 2.0                    | 89.8                     | 102.5               |
| C                   | 4.3                    | 12.3                   | 11.6                   | 5.5                    | 69.1                     | 102.8               |
|                     | 2.1                    | 5.3                    | 7.9                    | 2.2                    | 81.0                     | 98.5                |
|                     | 5.7                    | 5.2                    | 7.4                    | 7.0                    | 77.2                     | 102.5               |

\*n.d. means “not detectable”

Table S4. Cumulative Hg<sup>II</sup> losses from reused denuders (previously subjected to several heating cycles), collected on Au-traps, after a 2-hour exposure to various airflows. Experiments were conducted without mass balance (leftover Hg<sup>II</sup> on denuders after the exposure period was not measured).

| Exp.<br>no. | Ambient air<br>(% losses – 2 hrs) | N <sub>2</sub> flow<br>(% losses – 2 hrs) |
|-------------|-----------------------------------|-------------------------------------------|
| 1           | 32.4                              | 11.9                                      |

|    |      |      |
|----|------|------|
| 2  | 41.8 | 12.0 |
| 3  | 32.6 | 6.1  |
| 4  | 54.3 | 16.8 |
| 5  | 79.4 | 6.2  |
| 6  | 66.9 | 4.7  |
| 7  | 53.1 | 3.8  |
| 8  | 59.1 | 2.1  |
| 9  | 33.6 | 0.5  |
| 10 | 29.4 | 2.6  |
| 11 | 77.3 |      |
| 12 | 49.1 |      |
| 13 | 79.7 |      |
| 14 | 35.6 |      |
| 15 | 71.0 |      |
| 16 | 63.8 |      |
| 17 | 37.0 |      |
| 18 | 16.7 |      |
| 19 | 42.7 |      |
| 20 | 63.5 |      |

#### S5. Description of microwave digestion for CEMs

A set of three CEM membranes loaded with  $^{197}\text{Hg}^{\text{II}}$  were precisely weighed (0.3g each) using a high-precision balance. The weighed membranes were individually transferred to pre-cleaned digestion vessels. The digestion process began with a sequential addition of concentrated acids: 4 mL  $\text{HNO}_3$  (65% Suprapur), followed by 1 mL  $\text{HCl}$  (37% Suprapur), allowing sufficient reaction time between each addition. After a 30-minute reaction period at room temperature, the vessels were securely sealed and placed in the Milestone ETHOS 1 Advanced Microwave Digestion System. The digestion program consisted of four stages: a 20-minute ramp period to reach 200°C, 15 minutes of digestion at 200°C, a 5-minute hold time, and a 30-minute cooling period before vessel opening. Following digestion, the samples were quantitatively transferred to 15-mL conical vials and diluted to a final volume of 15 mL using high-purity MQ water (water with a resistivity of 18.2 MΩcm, purified in a Millipore Elix® Essential 5 UV Milli-Q system). From this, 8 mL aliquot was transferred into glass vial immediately for measurements in the well-type gamma detector.

Table S6. Recovery of  $\text{Hg}^{\text{II}}$  residuals from CEMs previously subjected to  $\text{BrCl}$  digestion, by microwave digestion method.

| HgBr <sub>2</sub> loaded on CEM (10ng)                     |              |              |              |
|------------------------------------------------------------|--------------|--------------|--------------|
| % recovery of initially loaded $\text{Hg}^{\text{II}}$     | CEM A        | CEM B        | CEM C        |
| Ambient air exposure losses in 72 hrs                      | 5.2          | 5.6          | 4.8          |
| CEM digestate – $\text{BrCl}$ digestion                    | 84.8         | 85.5         | 88.4         |
| CEM residuals – post $\text{BrCl}$ digestion               | <b>3.3</b>   | <b>4.2</b>   | <b>4.5</b>   |
| Filter pack acid wash                                      | 4.9          | 3.4          | 2.6          |
| Mass balance                                               | 98.2         | 98.7         | 100.2        |
| Total recovery from CEM alone (before microwave digestion) | <b>96.2</b>  | <b>95.3</b>  | <b>95.2</b>  |
| Residuals recovered from CEM by microwave digestion        | <b>4.1</b>   | <b>4.6</b>   | <b>4.4</b>   |
| Total recovery from CEM alone (after microwave digestion)  | <b>100.8</b> | <b>100.4</b> | <b>100.0</b> |
